# Supplementary material for: Beyond word error rate: Multidimensional evaluation of ASR performance for digital speech biomarkers
Source: Research Square preprint supplement (doi:10.21203/rs.3.rs-8824529/v1), 2026-02-17
Supplement: Supplementary file 1 [file 4a4620d5e2718fa19bc50b23.docx]

Title: **Beyond word error rate: Multidimensional evaluation of ASR performance for digital speech biomarkers**

Authors: Thayabaran Kathiresan, Zona Ling, Loretta Gasparini, Stephanie Eliza Piccolo, Clara Tjiandra, Hana Elhammamy, Amy Brodtmann, Adam P. Vogel

# Supplementary Materials

Supplementary Table 1 | Universal Part-of-Speech tags used in evaluation

Description of the 13 Universal Part-of-Speech (POS) categories used for distributional analysis in the evaluation framework.

| **POS Tag** | **Meaning** | **Example Words** |
| --- | --- | --- |
| **ADJ** | Adjective | happy, blue, big |
| **ADP** | Adposition (preposition/postposition) | on, in, by, under |
| **ADV** | Adverb | quickly, very, not, here |
| **AUX** | Auxiliary Verb | is, was, have, do (as helpers) |
| **CCONJ** | Coordinating Conjunction | and, but, or, yet |
| **DET** | Determiner | the, a, an, this, those |
| **INTJ** | Interjection | oh, wow, ah, oops |
| **NOUN** | Noun | car, dog, book, idea |
| **PART** | Particle | to (as in *to go*), not, 's |
| **PRON** | Pronoun | he, she, it, they |
| **PROPN** | Proper Noun | John, Australia, Google |
| **SCONJ** | Subordinating Conjunction | because, although, if, while |
| **VERB** | Main Verb | run, eat, think |
